# Supplementary material for: Cellular senescence with SASP in periodontal ligament cells triggers inflammation in aging periodontal tissue
Source: publisher site journal article supplement (doi:10.18632/aging.204569), 2023-03-01

## SUPPLEMENTARY TABLES

Supplementary Table 1. Primers used in this study.

| <i>human</i>  |                                                                    |
|---------------|--------------------------------------------------------------------|
| <i>Gene</i>   | Real time qPCR primers                                             |
| <i>P16</i>    | 5'-CCTTTGGTTATCGCAAGCTG-3'<br>5'-CCCTGTAGGACCTTCGGTGA-3'           |
| <i>P21</i>    | 5'-TCAAATCGTCCAGCGACCTTC-3'<br>5'-CATGCCCTGTCCATAGCCTCTAC-3'       |
| <i>TP53</i>   | 5'-TCGAGATGTTCCGAGAGCTGAAT-3'<br>5'-GTCTGAGTCAGGCCCTTCTGTCTT-3'    |
| <i>Klotho</i> | 5'-AGCAATCTGGTCTGAATAACACTGG-3'<br>5'-CATGTTTCAGCGTGAAAGTTCAAAG-3' |
| <i>IL6</i>    | 5'-AAGCCAGAGCTGTGCAGATGAGTA-3'<br>5'-TGTCCCTGCAGCCACTGGTTC-3'      |
| <i>IL8</i>    | 5'-ACACTGCGCCAACACAGAAATTA-3'<br>5'-TTTGCTTGAAGTTTCACTGGCATC-3'    |
| <i>MMP1</i>   | 5'-ACAACCTGCCAAATGGGCTTGA-3'<br>5'-CTGTCCCTGAACAGCCCAGTACTTA-3'    |
| <i>MMP2</i>   | 5'-CTCATCGCAGATGCCTGGAA-3'<br>5'-TTCAGGTAATAGGCACCCTTGAAGA-3'      |
| <i>MMP3</i>   | 5'-TTTCCAGGGATTGACTCAAAGA-3'<br>5'-AAGTGCCCATATTGTGCCTTC-3'        |
| <i>TIMP1</i>  | 5'-CCTTATACCAGCGTTATGAGATCAA-3'<br>5'-AGTGATGTGCAAGAGTCCATCC-3'    |
| <i>TIMP2</i>  | 5'-GGAGCACTGTGTTTATGCTGGAA-3'<br>5'-GACCGAGCGATTGCTCAAGA-3'        |
| <i>SIRT1</i>  | 5'-CCCAGAACATAGACACGCTGGA-3'<br>5'-ATCAGCTGGGCACCTAGGACA-3'        |
| <i>HPRT</i>   | 5'-GGCAGTATAATCCAAAGATGGTCAA-3'<br>5'-GTCAAGGGCATATCCTACAACAAAC-3' |
| <i>mice</i>   |                                                                    |
| <i>p16</i>    | 5'-GACGGGCATAGCTTCAGCTC-3'<br>5'-ATTTAGCTCTGCTCTTGGGATTGG-3'       |
| <i>p21</i>    | 5'-GTCGCTGTCTTGCCTCTGG-3'<br>5'-CCAATCTGCGCTTGGAGTGATA-3'          |
| <i>Il6</i>    | 5'-CCACTTCACAAGTCGGAGGCTTA-3'<br>5'-GCAAGTGCATCATCGTTGTTCATAC-3'   |
| <i>Hprt</i>   | 5'-TTGTTGTTGGATATGCCCTTGACTA-3'<br>5'-AGGCAGATGGCCACAGGACTA-3'     |

**Supplementary Table 2. Cytokines and chemokine map for dot plot assay.**

|                  |                 |                  |                  |                |              |                         |                        |                    |                  |
|------------------|-----------------|------------------|------------------|----------------|--------------|-------------------------|------------------------|--------------------|------------------|
| A1, A2           | A3, A4          | A5, A6           | A7, A8           | A9, A10        | A11, A12     | A13, A14                | A15, A16               | A17, A18           | A19, A20         |
| Positive Control | C5a             | CD40 ligand      | G-CSF            | GM-CSF         | GRO $\alpha$ | I-309                   | sICAM-1                | IFN- $\gamma$      | Positive Control |
| B1, B2           | B3, B4          | B5, B6           | B7, B8           | B9, B10        | B11, B12     | B13, B14                | B15, B16               | B17, B18           | B19, B20         |
|                  | IL-1 $\alpha$   | IL-1 $\beta$     | IL-1 $\alpha$    | IL-2           | IL-4         | IL-5                    | IL-6                   | IL-8               |                  |
| C1, C2           | C3, C4          | C5, C6           | C7, C8           | C9, C10        | C11, C12     | C13, C14                | C15, C16               | C17, C18           | C19, C20         |
|                  | IL-10           | IL-12 p70        | IL-13            | IL-16          | IL-17        | IL-17E                  | L-23                   | IL-27              |                  |
| D1, D2           | D3, D4          | D5, D6           | D7, D8           | D9, D10        | D11, D12     | D13, D14                | D15, D16               | D17, D18           | D19, D20         |
|                  | IL-32 $\alpha$  | CXCL10/<br>IP-10 | CXCL11/<br>I-TAC | CCL2/<br>MCP-1 | MIF          | CCL3/<br>MIP-1 $\alpha$ | CCL4/<br>MIP-1 $\beta$ | SerpinE1/<br>PAI-1 |                  |
| E1, E2           | E3, E4          | E5, E6           | E7, E8           | E9, E10        | E11, E12     | E13, E14                | E15, E16               | E17, E18           | E19, E20         |
| Positive Control | CCL5/<br>RANTES | CXCL12/<br>SDF-1 | TNF- $\alpha$    | sTREM-1        |              |                         |                        |                    | Negative Control |

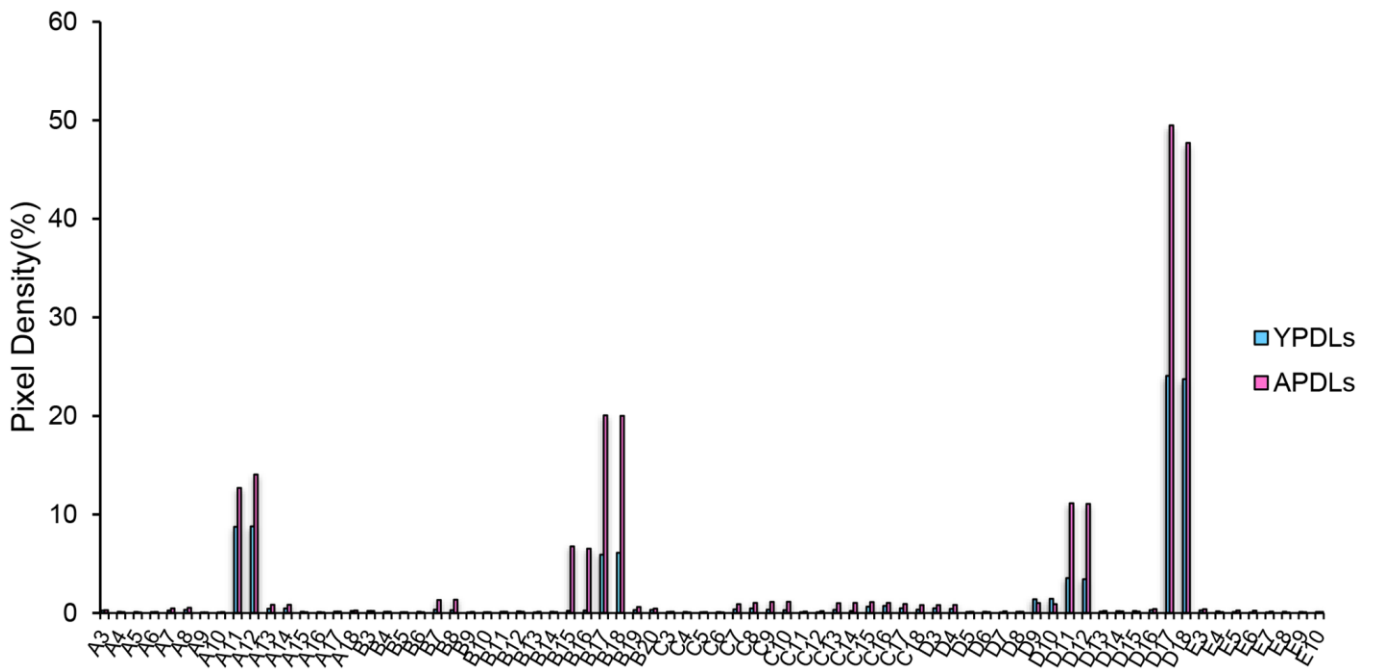

Supplement: Supplementary file [file aging-v15i5-204569-supplementary-material-SD2.pdf]
