# Supplementary material for: Cellular senescence with SASP in periodontal ligament cells triggers inflammation in aging periodontal tissue
Source: publisher site journal article supplement (doi:10.18632/aging.204569), 2023-03-01
Supplement: Supplementary file [file aging-v15i5-204569-supplementary-material-SD1.pdf]

SUPPLEMENTARY FIGURES

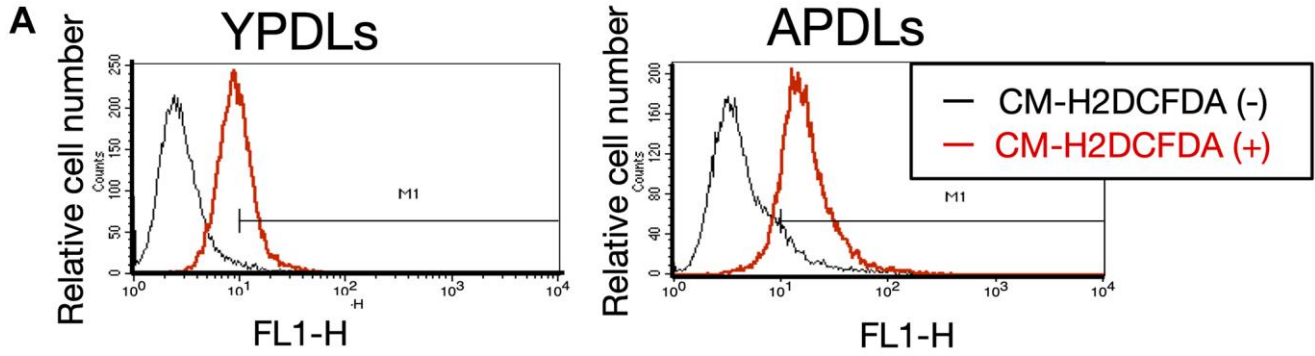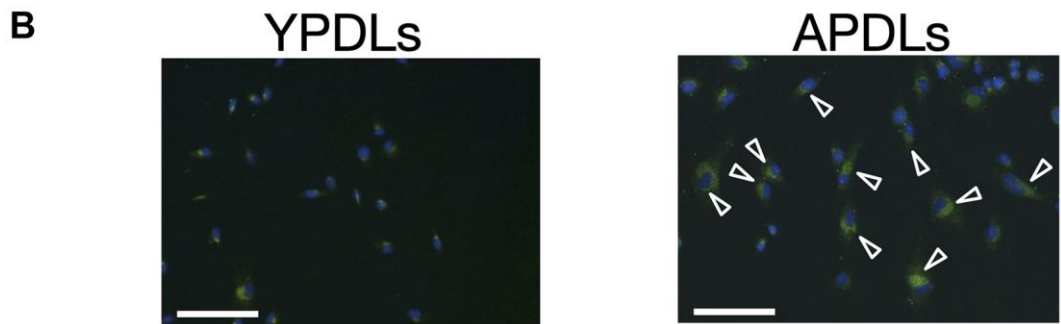

**Supplementary Figure 1. Observation of endogenous ROS in YPDLs and APDLs.** (A) Analysis of cytosolic ROS stained with CF-H2DCFDA in YPDLs and APDLs. The ratio of MFI in control HPDLs to CM-H2DCFDA-labeled HPDLs for aged HPDLs (3.06) was higher than that of young HPDLs (3.16). (B) Fluorescence image of cytosolic ROS stained with CF-H2DCFDA in YPDLs and APDLs (1000 $\times$ ). Scale bar = 1 mm.

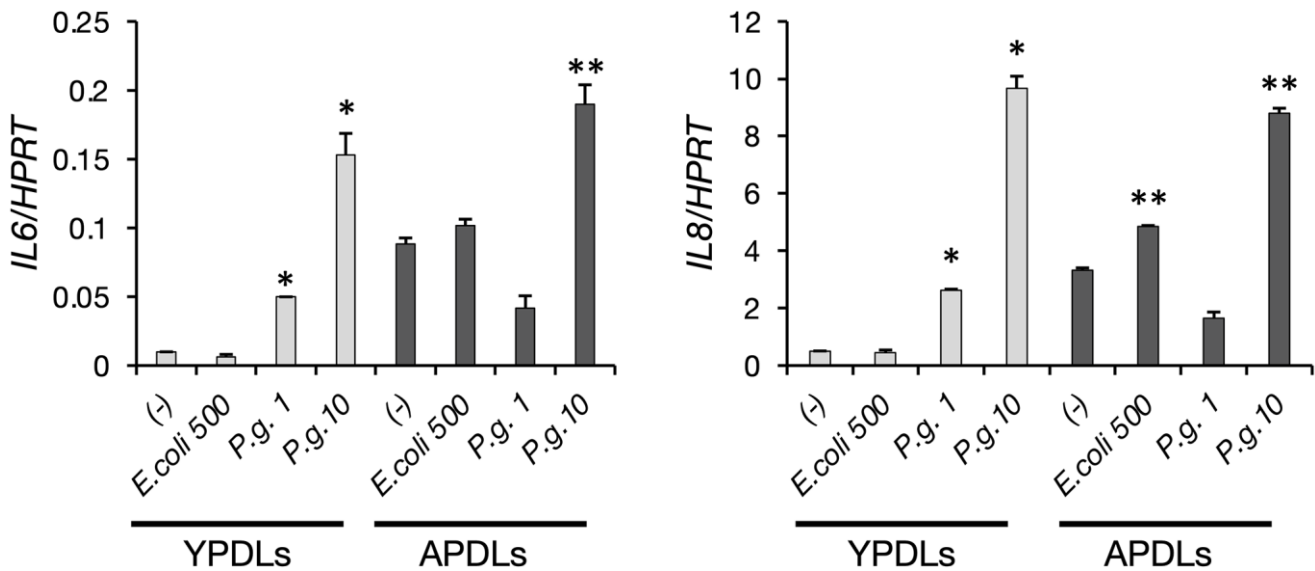

**Supplementary Figure 2. Comparison of IL-6 production induced by *P.g* LPS or *E. coli* LPS bacterial pathogens in senescent HPDL cells.** Relative mRNA expression of IL-6 following stimulation by *P.g* LPS (1, 10  $\mu$ g/mL) or *E. coli* LPS (500 ng/mL) in YPDLs and APDLs was quantified by qRT-PCR (\* $p$  < 0.01 vs. YPDLs none, \*\* $p$  < 0.01 vs. APDLs none).

**A**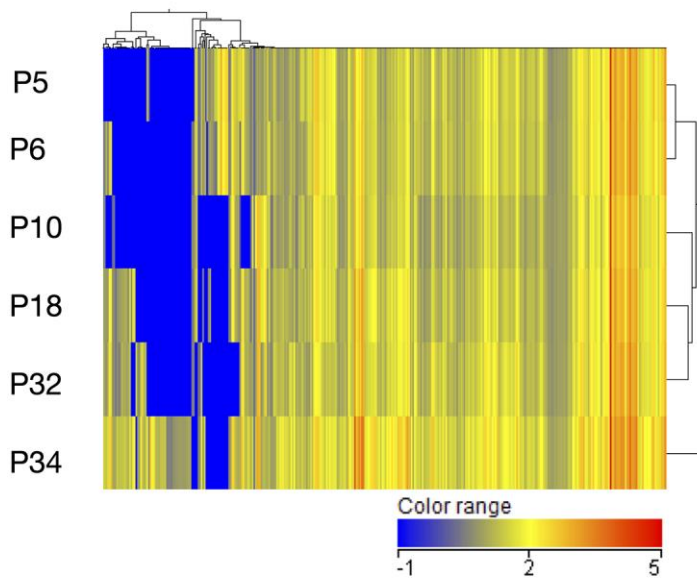**B**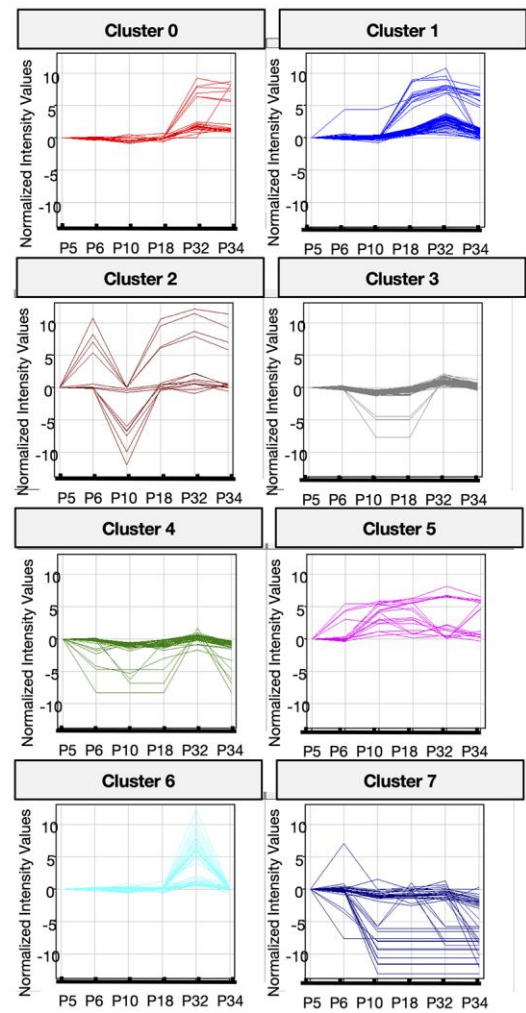

**Supplementary Figure 3. Comprehensive analysis of miRNAs in HPDL cells.** (A) Hierarchical analysis of miRNAs in P5, P6, P10, P18, P32, and P34 HPDL cells. (B) K-means clustering analysis. The classified eight patterns are shown.

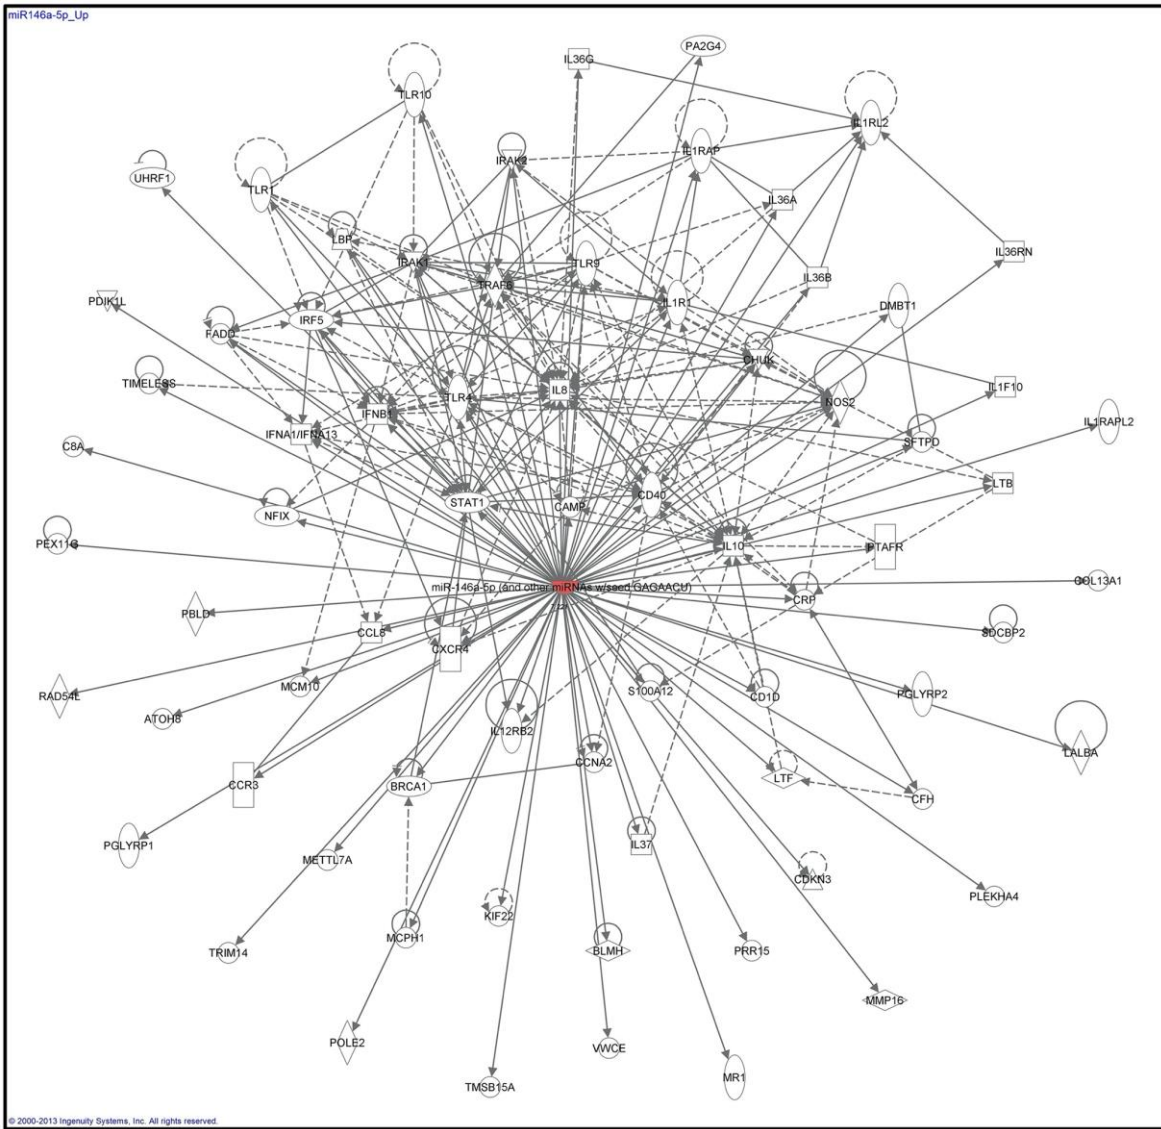

Supplementary Figure 4. IPA analysis of miR-146a in miRNA array analysis.

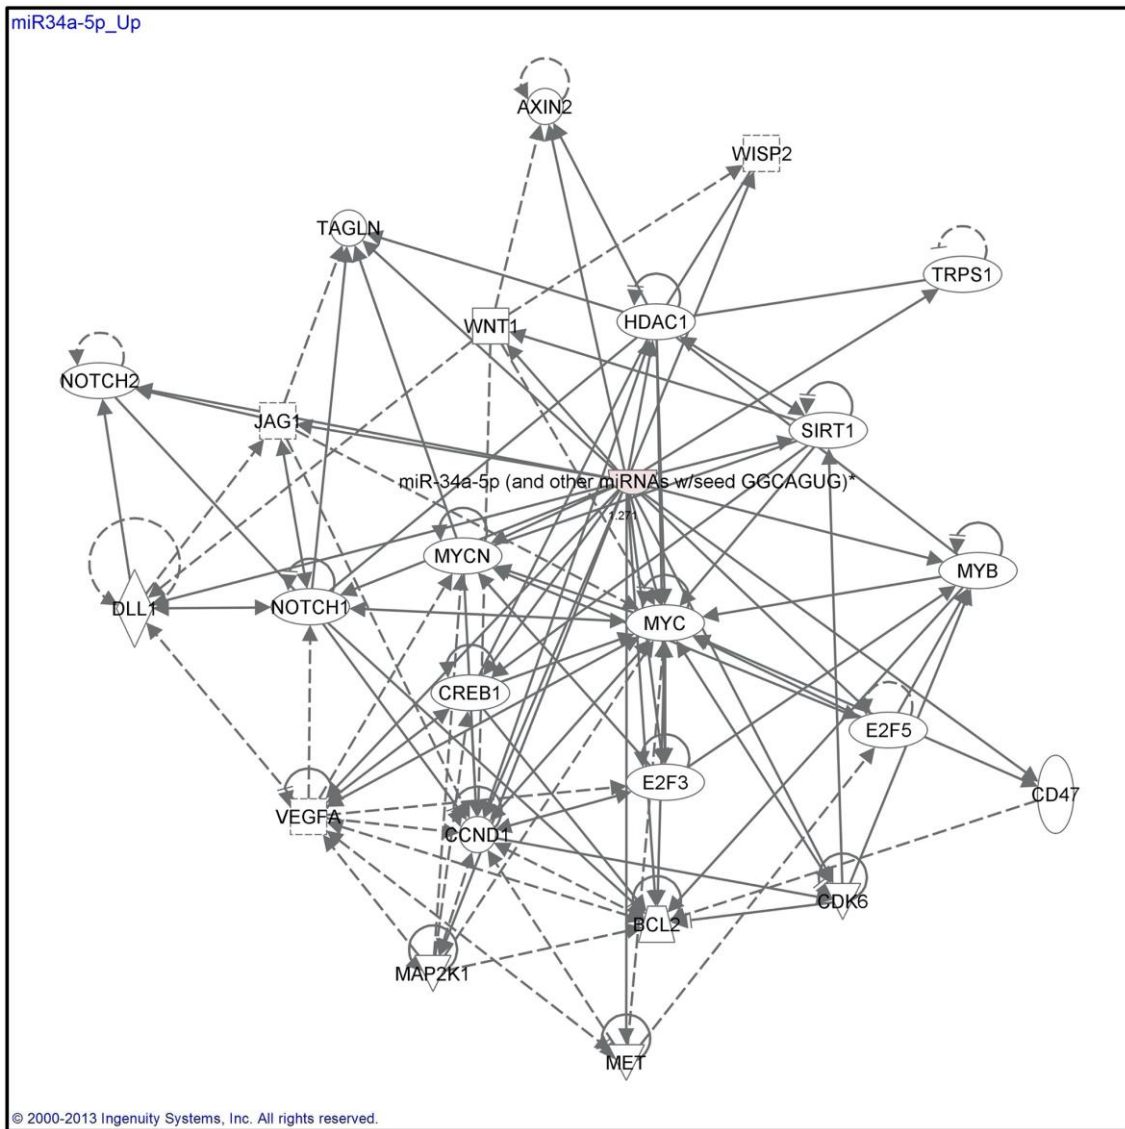

Supplementary Figure 5. IPA analysis of miR-34a in miRNA array analysis.

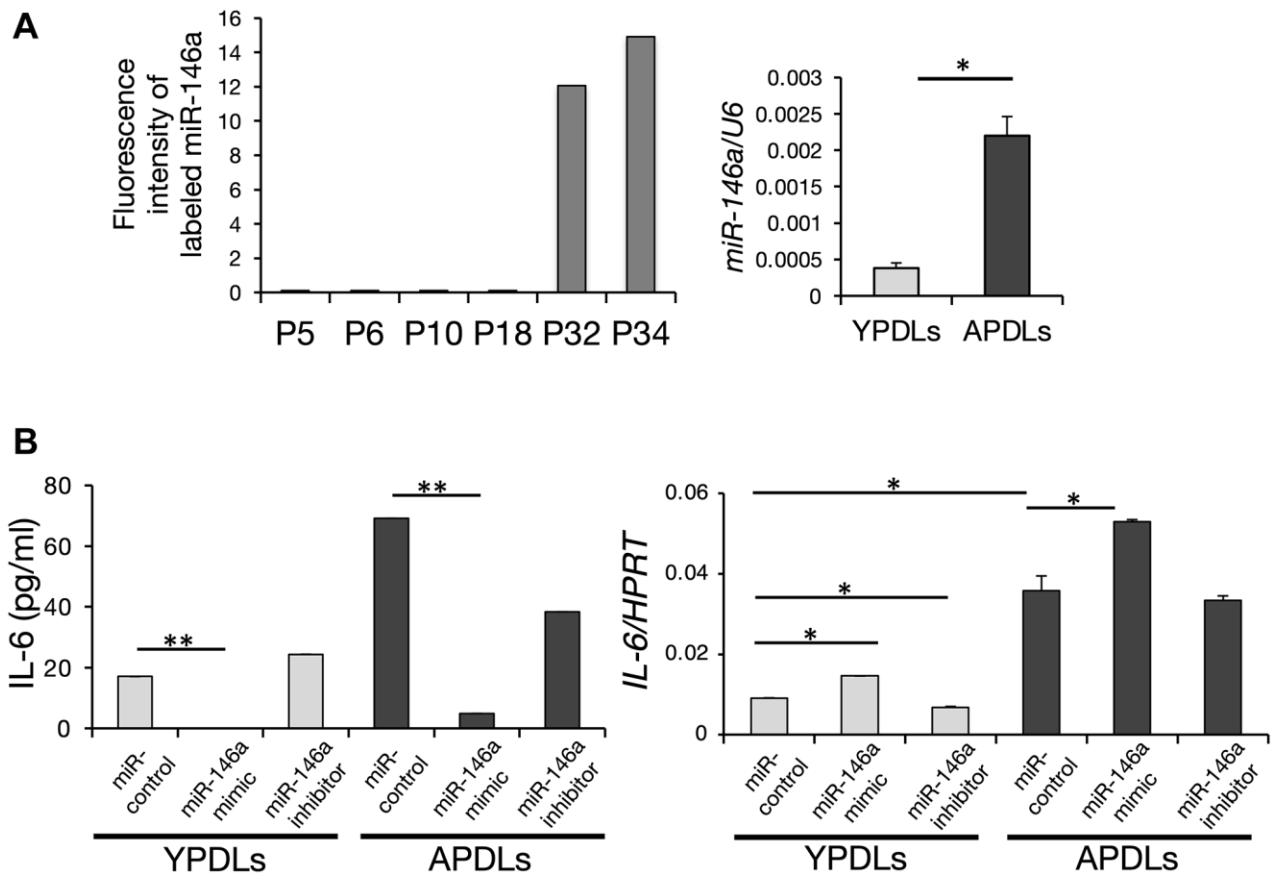

**Supplementary Figure 6. Increased expression of miR-146a in senescent HPDL cells.** (A) Expression of miR-146a was increased depending on the passage of HPDL cells. Scores of the fluorescence intensity of labeled miR-146a in miRNA array analysis of P5, P6, P10, P18, P32, and P34 HPDL cells is displayed in the histogram. Right graph, Expression of miR-146a in YPDLs and APDLs analyzed by qRT-PCR ( $*p < 0.01$  vs. P6). (B) Overexpression of miR-146a inhibited IL-6 production in HPDL cells. MiR-146a mimic and anti-miR146a inhibitor oligonucleotides were transfected into YPDLs and APDLs. Expression of IL-6 was measured by an ELISA and qRT-PCR. Representative data from three experiments are shown.
